# Supplementary material
Source: PubMed Central journal article supplement (PMC6245599)
Supplement: NIHMS1500134-supplement-2.pdf [file NIHMS1500134-supplement-2.pdf]

| Subject | tSNR |      |      | Variance explained |     |     |
|---------|------|------|------|--------------------|-----|-----|
|         | V1   | LGN  | SC   | V1                 | LGN | SC  |
| 1       | 59.4 | 44.3 | 25.6 | 80%                | 27% | 11% |
| 2       | 61.3 | 43.7 | 10.6 | 50%                | 17% | 4%  |
| 3       | 53.6 | 38.7 | 15.6 | 51%                | 16% | 7%  |
| 4       | 53.7 | 46.8 | 22.4 | 54%                | 27% | 6%  |
| 5       | 62.8 | 44.1 | 30.1 | 64%                | 22% | 11% |
| 6       | 61.8 | 53.0 | 26.5 | 53%                | 29% | 8%  |
| 7       | 55.3 | 49.4 | 20.3 | 65%                | 25% | 8%  |
| 8       | 47.3 | 36.9 | 22.5 | 95%                | 31% | 12% |
| 9       | 52.6 | 42.1 | 23.8 | 72%                | 32% | 13% |
| 10      | 56.1 | 35.6 | 23.6 | 53%                | 18% | 2%  |
| 11      | 66.1 | 47.4 | 36.6 | 74%                | 26% | 11% |
| 12      | 53.1 | 49.1 | 30.9 | 89%                | 46% | 21% |
| 13      | 55.7 | 33.9 | 16.7 | 86%                | 21% | 7%  |
| 14      | 60.8 | 46.3 | 27.6 | 71%                | 35% | 7%  |
| 15      | 56.4 | 50.3 | 23.1 | 72%                | 26% | 8%  |
| 16      | 42.4 | 38.2 | 20.2 | 58%                | 24% | 9%  |
| 17      | 45.3 | 36.9 | 23.2 | 80%                | 29% | 15% |
| 18      | 48.9 | 39.1 | 30.6 | 43%                | 26% | 8%  |
| 19      | 62.2 | 33.0 | 17.6 | 47%                | 19% | 6%  |
| 20      | 68.1 | 49.7 | 22.4 | 62%                | 23% | 5%  |
| 21      | 60.8 | 35.2 | 25.7 | 86%                | 16% | 10% |
| 22      | 75.1 | 37.6 | 22.6 | 77%                | 12% | 12% |
| 23      | 48.8 | 35.3 | 21.3 | 54%                | 15% | 10% |

**Supp. Table 1: Individual subject variability.** tSNR column shows the mean tSNR in each ROI (estimate is somewhat lower because of presence of stimulus-driven responses). Variance explained column shows the relative variance of the trial response fit, divided by the ROI timeseries variance. The low tSNR in SC is correlated across subjects with the lower variance explained ( $R=0.45$ ,  $p=0.025$ , Pearson's correlation).
